# Supplementary material
Source: HighWire-hosted journal article supplement (https://www.cmaj.ca/highwire/filestream/59769/field_highwire_adjunct_files/0/151447-res-1-at.pdf)
Supplement: 151447-res-1-at.pdf [file 151447-res-1-at.pdf]

**Appendix 1 (as supplied by the authors): Claims codes to identify comorbidity**

| <b>Comorbidities</b>                  | <b>ICD</b> | <b>Codes</b>                                                                                                                                                                  |
|---------------------------------------|------------|-------------------------------------------------------------------------------------------------------------------------------------------------------------------------------|
| Myocardial infarction                 | ICD 10     | I21.x, I22.x, I25.2                                                                                                                                                           |
|                                       | ICD-9-CM   | 410.x, 412.x                                                                                                                                                                  |
| Peripheral vascular disease           | ICD 10     | I70.x, I71.x, I73.1, I73.8, I73.9, I77.1, I79.0, I79.2, K55.1, K55.8, K55.9, Z95.8, Z95.9                                                                                     |
|                                       | ICD-9-CM   | 093.0, 437.3, 440.x, 441.x, 443.1-443.9, 47.1, 557.1, 557.9, V43.4                                                                                                            |
| Cerebrovascular disease               | ICD 10     | G45.x, G46.x, I60.x-I69.x, H34.0                                                                                                                                              |
|                                       | ICD-9-CM   | 362.34, 430.x-438.x                                                                                                                                                           |
| Chronic obstructive pulmonary disease | ICD 10     | 490.x-505.x, 506.4                                                                                                                                                            |
|                                       | ICD-9-CM   | I27.8, I27.9, J40.x-J47.x, J60.x-J67.x, J68.4, J70.1, J70.3                                                                                                                   |
| Congestive heart failure              | ICD 10     | I43.x, I50.x, I09.9, I11.0, I13.0, I13.2, I25.5, I42.0, I42.5-I42.9, P29.0                                                                                                    |
|                                       | ICD-9-CM   | 398.91, 402.01, 402.11, 402.91, 404.01, 404.03, 404.11, 404.13, 404.91, 404.93, 425.4-425.9, 428.x                                                                            |
| Diabetes Uncomplicated                | ICD 10     | E10.0, E10.1, E10.6, E10.8, E10.9, E11.0, E11.1, E11.6, E11.8, E11.9, E12.0, E12.1, E12.6, E12.8, E12.9, E13.0, E13.1, E13.6, E13.8, E13.9, E14.0, E14.1, E14.6, E14.8, E14.9 |
|                                       | ICD-9-CM   | 250.0-250.3, 250.8, 250.9                                                                                                                                                     |
| Diabetes Complicated                  | ICD 10     | E10.2-E10.5, E10.7, E11.2-E11.5, E11.7, E12.2-E12.5, E12.7, E13.2-E13.5, E13.7, E14.2-E14.5, E14.7                                                                            |
|                                       | ICD-9-CM   | 250.4-250.7                                                                                                                                                                   |
| Non-dermatologic malignancy           | ICD 10     | C00.x-C26.x, C30.x-C34.x, C37.x-C41.x, C43.x, C45.x-C58.x, C60.x-C76.x, C81.x-C85.x, C88.x, C90.x-C97.x                                                                       |
|                                       | ICD-9-CM   | 140.x-172.x, 174.x-195.8, 200.x-208.x, 238.6                                                                                                                                  |

**Reference:**

Quan H, Sundaratajan V, Halfon P, et al. Coding algorithms for defining comorbidities in ICD-9-CM and ICD-10 administrative data. *Med Care* 2005;43(11):1130-1139.
